# Supplementary material
Source: PubMed Central journal article supplement (PMC4787867)
Supplement: malg700435.ww1_default.pdf [file malg700435.ww1_default.pdf]

## Medline search strategy for the association of umbilical cord pH with neonatal and long term outcomes

The following MESH headings (exp indicates selection expanded) and keywords (followed by 'mp') were used:

1. cord gases.mp.
2. cord pH.mp.
3. umbilical artery pH.mp.
4. umbilical cord blood.mp.
5. Blood Gas Analysis
6. exp Umbilical Cord
7. exp Hydrogen-Ion Concentration
8. Blood/ or blood.mp.
9. exp Infant, Newborn
10. Asphyxia Neonatorum
11. exp Brain Damage, Chronic
12. exp Hypoxia-Ischemia, Brain
13. exp Mental Disorders Diagnosed in Childhood
14. cerebral palsy.mp.
15. developmental delay.mp.
16. hypoxic ischaemic encephalopathy.mp.
17. handicap\*.mp.
18. mental retard\*.mp.
19. feeding difficulties.mp.
20. Infant Mortality
21. Child Mortality

The search terms were combined as follows:

22. 1 or 2 or 3 or 4 or 5
23. 6 and 7 and 8
24. 22 or 23
25. 9 and 24
26. 10 or 11 or 12 or 13 or 14 or 15 or 16 or 17 or 18 or 19 or 20 or 21
27. 25 and 26
28. Limit 27 to humans

Search results:

Medline 2983 citations

Embase 2701 citations

Web of Science 1179 citations

Cochrane library 5 citations

MEDION 0 citations

SIGLE 0 citations

Excluding duplicates Total = 5690
