# Supplementary material
Source: PubMed Central journal article supplement (PMC4787867)
Supplement: malg700435.ww2_default.pdf [file malg700435.ww2_default.pdf]

Harbord test for studies of the association umbilical cord pH and neonatal mortality and morbidity

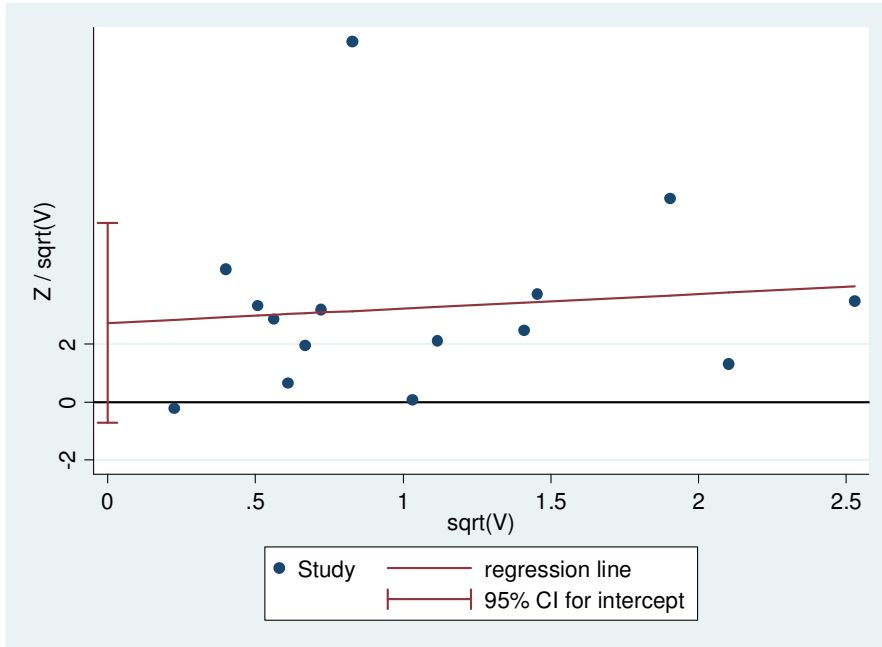

Arterial cord pH and neonatal mortality (15 studies: no small-study effects

P = 0.111

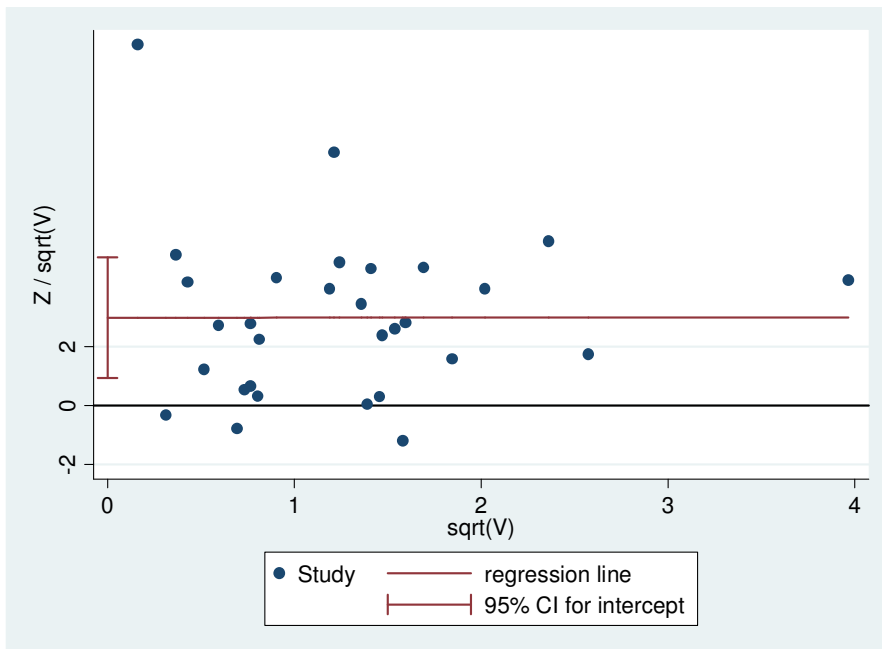

Arterial cord pH and neonatal morbidity (30 studies:) no small-study effects

P = 0.006
